# Supplementary material for: Human factors in escalating acute ward care: a qualitative evidence synthesis
Source: PubMed Central journal article supplement (PMC7919590; doi:10.1136/bmjoq-2020-001145), 2021-02-26

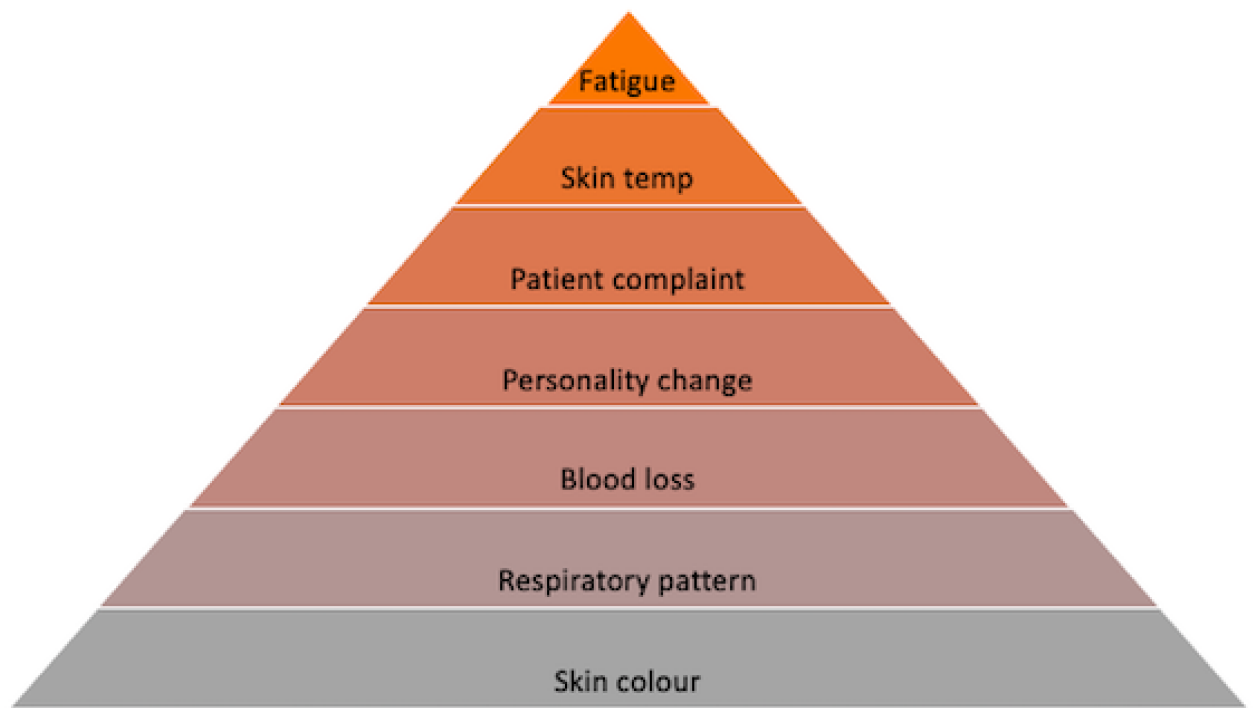

Supplement: bmjoq-2020-001145supp004.pdf [file bmjoq-2020-001145supp004.pdf]
